# Supplementary material for: Influence of the kinesiophobia and its pain intensity relationship in subjects with onychocryptosis
Source: PeerJ. 2024 Sep 5;12:e18022. doi: 10.7717/peerj.18022 (PMC11380834; doi:10.7717/peerj.18022)
Supplement: Data S1 [file peerj-12-18022-s001.xlsx]

## Sheet: Hoja1
Patient	Weight (kg)	Height (m)	sex	age	BMI (Kg/m2)	onychocryptosis stage	score TSK-11 SV 1ª consultation	score scale VAS 1ª consultation	score TSK-11 SV consultation after first month	score scale VAS consultation after first month
1	59	162	Female	42	22.4813	2	DS	8	19	0
5	68	160	Female	50	26.5625	2	36	10	16	0
6	67	160	Female	55	26.1719	2	41	9	16	0
7	52	169	Female	24	18.2066	2	43	10	16	0
8	50	152	Female	53	21.6413	2	34	9	17	0
10	68	170	Female	56	23.5294	2	23	8	16	0
13	79	168	Female	51	27.9904	2	37	8	15	0
14	50	163	Female	19	18.8189	2	23	8	12	0
16	67	165	Female	46	24.6097	2	33	9	14	0
24	49	157	Female	19	19.8791	3	42	8	18	0
2	73	167	Male	84	26.1752	2	40	9	21	1
3	80	179	Male	67	24.968	1	35	7	20	1
4	90	180	Male	30	27.7778	3	41	8	14	0
9	70	180	Male	32	21.6049	2	38	4	15	0
11	65	173	Male	23	21.7181	2	36	7	15	0
12	75	167	Male	37	26.8923	1	21	2	15	0
15	90	182	Male	23	27.1706	3	44	8	14	0
17	68	165	Male	50	24.977	3	34	2	14	0
18	102	185	Male	26	29.8028	3	33	9	17	0
19	69	162	Male	18	26.2917	2	35	8	13	0
22	70	165	Male	29	25.7117	2	31	7	15	0
23	80	179	Male	26	24.968	2	31	5	15	0
25	90	168	Male	76	31.8878	3	44	7	24	0
20	105	180	Male	52	32.4074	3	44	10	16	0
21	85	190	Male	36	23.5457	2	23	7	14	0
									16.04
									2.66896
									1.10169
									14.9383
									17.1417

## Sheet: Hoja2
Patients	pre 1. I am afraid of hurting myself if I exercise.	pre 2. If I let myself be overcome by the pain, the pain would increase	pre 3. My body is telling me that I have something serious.	pre 4. Having pain always means that there is an injury in the body.	pre 5. I am afraid of accidentally injuring myself	pre 6. The safest way to avoid increasing pain is to be careful and not unnecessary movements.	pre 7. It wouldn´t hurt so much if I didn´t have something serious in my body.	pre 8. The pain tells me when to stop the activity so as not to injure myself	pre 9. It is not safe for a person with my disease to do physical activities.	pre 10. I can´t do everything normal people do because I could easily get injured.	pre 11. No one should be physically active when they are in pain.	post 1. I am afraid of hurting myself if I exercise.	post 2. If I let myself be overcome by the pain, the pain would increase	post 3. My body is telling me that I have something serious.	post 4. Having pain always means that there is an injury in the body.	post 5. I am afraid of accidentally injuring myself	post 6. The safest way to avoid increasing pain is to be careful and not unnecessary movements.	post 7. It wouldn´t hurt so much if I didn´t have something serious in my body.	post 8. The pain tells me when to stop the activity so as not to injure myself	post 9. It is not safe for a person with my disease to do physical activities.	post 10. I can´t do everything normal people do because I could easily get injured.	post 11. No one should be physically active when they are in pain.
SUBJECT 1	1	1	1	4	1	1	1	4	1	1	3	1	1	1	3	1	1	1	3	1	1	2
SUBJECT 2	4	4	4	2	4	4	4	4	4	3	3	1	2	1	2	1	1	1	1	4	1	3
SUBJECT 3	4	3	4	4	3	3	3	3	2	2	4	2	1	1	4	2	1	1	3	1	1	3
SUBJECT 4	4	4	4	3	4	3	3	4	4	4	4	1	1	1	3	1	1	1	1	1	1	2
SUBJECT 5	4	4	3	4	3	3	3	3	2	3	4	1	1	1	3	1	1	1	2	1	1	3
SUBJECT 6	4	4	3	3	4	4	4	4	4	3	4	1	2	1	3	1	1	2	1	1	1	3
SUBJECT 7	4	4	4	4	4	4	3	4	4	4	4	1	1	1	3	1	1	1	1	1	1	4
SUBJECT 8	1	4	4	4	2	1	4	4	3	3	4	1	1	1	3	1	1	1	1	1	1	4
SUBJECT 9	4	4	4	4	1	4	4	4	4	1	4	1	1	1	3	1	1	1	1	1	1	3
SUBJECT 10	1	4	3	4	1	4	3	1	1	1	1	1	1	1	4	1	2	1	2	1	1	1
SUBJECT 11	4	4	4	3	2	3	4	4	4	2	4	1	1	1	3	1	1	2	2	1	1	1
SUBJECT 12	2	1	1	4	1	2	2	3	1	1	3	1	1	1	4	1	1	1	2	1	1	1
SUBJECT 13	4	2	2	3	4	4	3	4	4	4	3	1	1	1	3	1	1	1	1	1	1	3
SUBJECT 14	2	4	2	3	2	1	3	2	2	1	1	1	1	1	3	1	1	1	1	1	1	1
SUBJECT 15	4	4	4	4	4	4	4	4	4	4	4	1	1	1	1	1	1	1	1	1	1	1
SUBJECT 16	3	4	3	2	2	3	3	4	2	4	3	1	1	1	2	1	1	1	1	1	1	3
SUBJECT 17	3	4	3	3	2	4	3	4	3	4	4	1	1	1	2	1	1	1	1	1	1	4
SUBJECT 18	2	4	4	4	1	1	4	4	4	1	4	1	1	1	4	1	1	1	1	1	1	4
SUBJECT 19	3	4	4	3	2	4	4	3	4	2	2	1	1	1	3	1	1	1	1	1	1	2
SUBJECT 20	3	4	3	2	3	4	2	3	3	2	4	1	1	1	2	1	1	1	1	1	1	4
SUBJECT 21	4	1	2	3	1	4	4	4	2	2	4	1	1	1	3	1	1	1	1	1	1	4
SUBJECT 22	4	1	2	3	1	4	4	4	2	2	4	1	1	1	3	1	1	1	1	1	1	4
SUBJECT 23	1	4	3	3	2	2	2	2	4	4	2	4	1	1	1	3	1	1	1	1	1	4
SUBJECT 24	4	4	4	4	4	4	4	4	3	3	4	1	1	1	4	1	1	1	2	1	1	4
SUBJECT 25	4	4	4	4	4	4	4	4	4	4	4	1	1	1	4	3	2	1	3	2	2	4
